# Supplementary material
Source: HighWire-hosted journal article supplement (https://www.life-science-alliance.org/content/4/4/e202000803/F9)

Figure 1C left

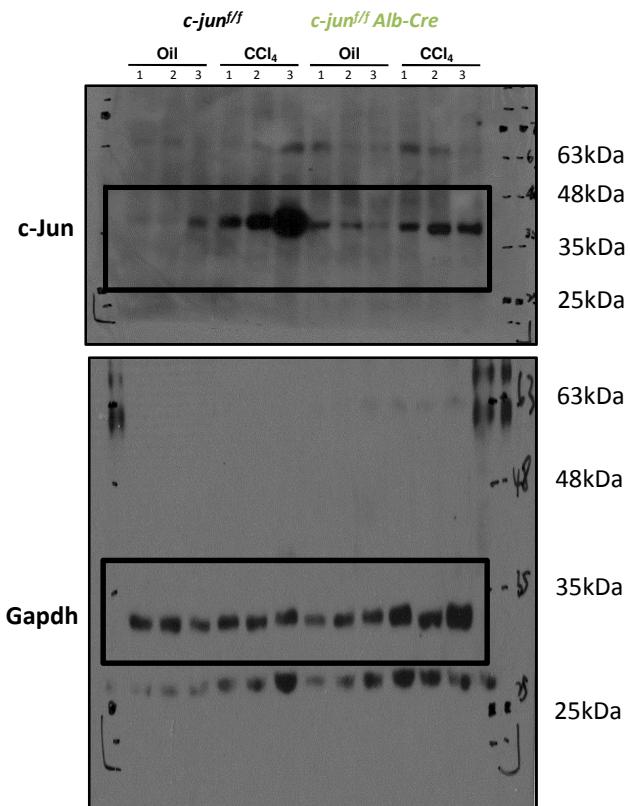

Figure 1C right

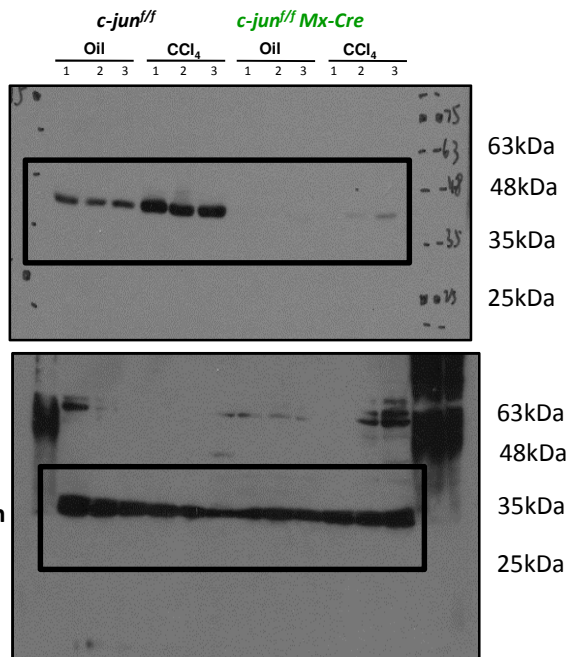

Figure 2F left

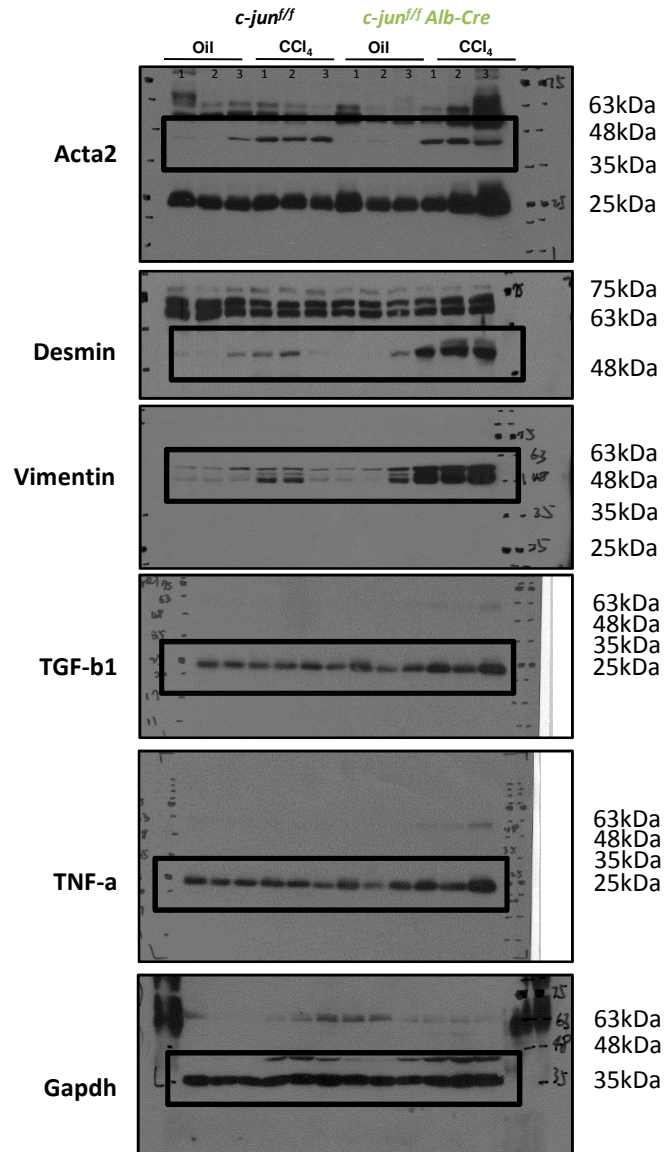

Figure 2F right

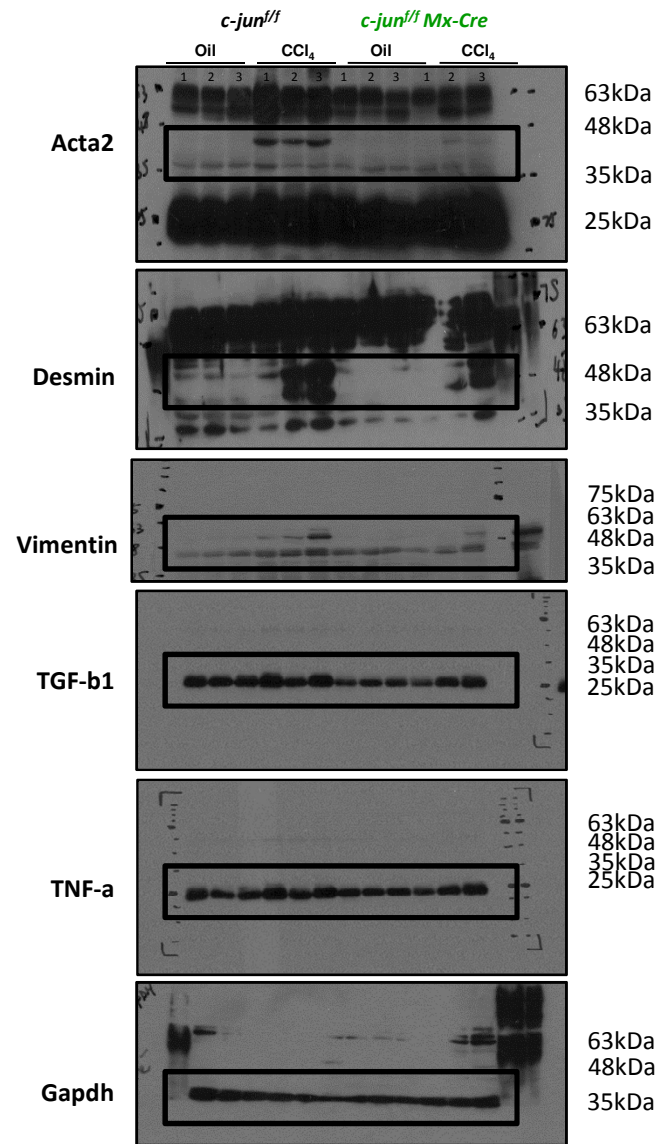

Figure 5E

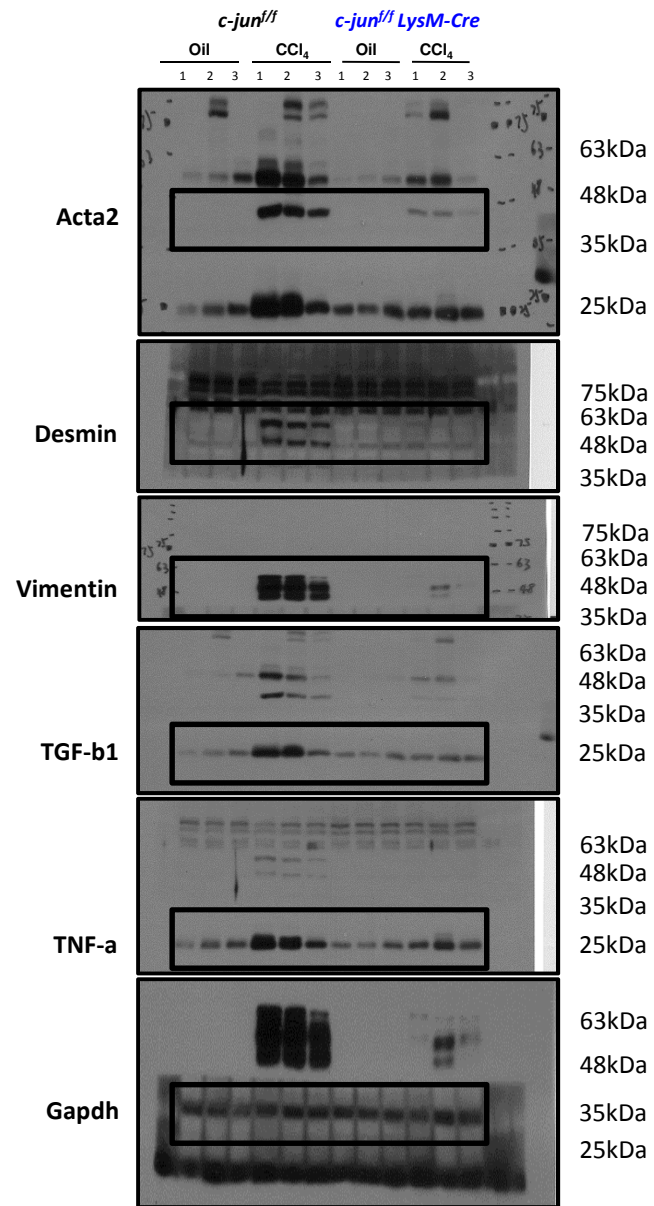

Figure 6B

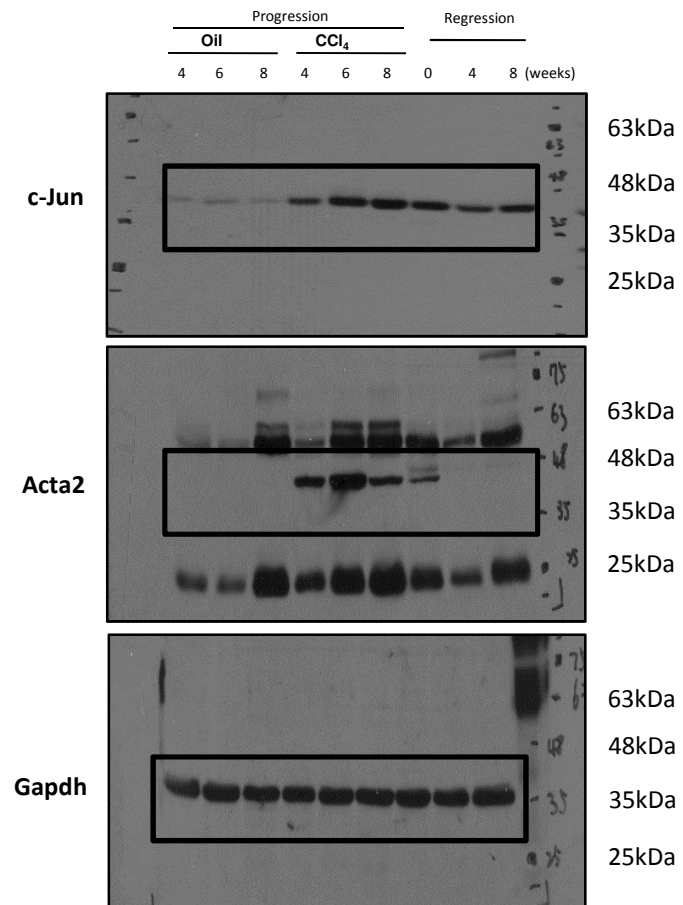

Supplement: inline-supplementary-material-5 [file inline-supplementary-material-5.pdf]
